# Supplementary material for: Essential Oil Chemotypes and Genetic Variability of Cinnamomum verum Leaf Samples Commercialized and Cultivated in the Amazon
Source: MDPI journal article supplement (doi:10.3390/molecules27217337), 2022-10-28
Supplement: s1 [file s1]

# Supplementary Material

## Essential oil chemotypes and genetic variability of *Cinnamomum verum* leaf samples commercialized and cultivated in the Amazon

Júlia Karla A. M. Xavier<sup>1</sup>, Talissa Gabriele C. Baia<sup>2</sup>, Oscar Victor C. Alegria<sup>3</sup>, Pablo Luis B. Figueiredo<sup>4</sup>, Adriana R. Carneiro<sup>3</sup>, Edith Cibelle de O. Moreira<sup>5</sup>, José Guilherme S. Maia<sup>1,6</sup>, William N. Setzer<sup>7</sup>, and Joyce Kelly R. da Silva<sup>1,7\*</sup>

<sup>1</sup> Programa de Pós-Graduação em Química, Universidade Federal do Pará, 66075-900, Belém, Brazil; julia.xavier@icen.ufpa.br (J.K.A.M.X)

<sup>2</sup> Programa Institucional de Bolsas de Iniciação Científica, Universidade Federal do Pará, 66075-900, Belém, Brazil; talissacaldasb@gmail.com (T.G.C.B.)

<sup>3</sup> Centro de Genômica e Biologia de Sistemas, Universidade Federal do Pará, 66075-900, Belém, Brazil; oscar.alegria@icb.ufpa.br (O.V.C.A); adrianarc@ufpa.br (A.R.C.)

<sup>4</sup> Departamento de Ciências Naturais, Centro de Ciências Sociais e Educação, Universidade do Estado do Pará, Belém, PA 66050-540, Brazil. pablo.figueiredo@uepa.br (P.L.B.F.)

<sup>5</sup> Instituto de Estudos em Saúde e Biológicas, Universidade Federal do Sul e Sudeste do Pará, 68501-970, Marabá, Brazil. cibelle@unifesspa.edu.br (E.C.M.);

<sup>6</sup> Programa de Pós-Graduação em Química, Universidade Federal do Maranhão, São Luís, MA 65080-805, Brazil; gmaia@ufpa.br (J.G.S.M.)

<sup>7</sup> Aromatic Plant Research Center, 230 N 1200 E, Suite 100, Lehi, UT 84043, USA. wsetzer@aromaticplant.org (W.N.S.)

\* Correspondence: joycekellys@ufpa.br (J.K.R.S.)

**Table S1.** Pairwise analysis of the *psbA-trnH* region using Kimura two-parameter method.

|               | <b>Cve1</b> | <b>Cve2</b> | <b>Cve3</b> | <b>Cve4</b> | <b>Cve5</b> | <b>Cve6-c</b> | <b>Cve7-c</b> | <b>Cve8-c</b> | <b>Cve9-c</b> |
|---------------|-------------|-------------|-------------|-------------|-------------|---------------|---------------|---------------|---------------|
| <b>Cve1</b>   |             |             |             |             |             |               |               |               |               |
| <b>Cve2</b>   | 0,014       |             |             |             |             |               |               |               |               |
| <b>Cve3</b>   | 0,007       | 0,012       |             |             |             |               |               |               |               |
| <b>Cve4</b>   | 0,002       | 0,017       | 0,010       |             |             |               |               |               |               |
| <b>Cve5</b>   | 0,010       | 0,014       | 0,002       | 0,012       |             |               |               |               |               |
| <b>Cve6-c</b> | 0,010       | 0,014       | 0,002       | 0,012       | 0,000       |               |               |               |               |
| <b>Cve7-c</b> | 0,017       | 0,027       | 0,015       | 0,019       | 0,012       | 0,012         |               |               |               |
| <b>Cve8-c</b> | 0,002       | 0,017       | 0,010       | 0,005       | 0,012       | 0,012         | 0,019         |               |               |
| <b>Cve9-c</b> | 0,019       | 0,029       | 0,027       | 0,017       | 0,029       | 0,029         | 0,037         | 0,022         |               |

*C. verum* cultivated (**Cve1-Cve5**); *C. verum* commercials (**Cve6-c-Cve9-c**).
